# Supplementary material
Source: PubMed Central journal article supplement (PMC5894812)

# Firmicutes

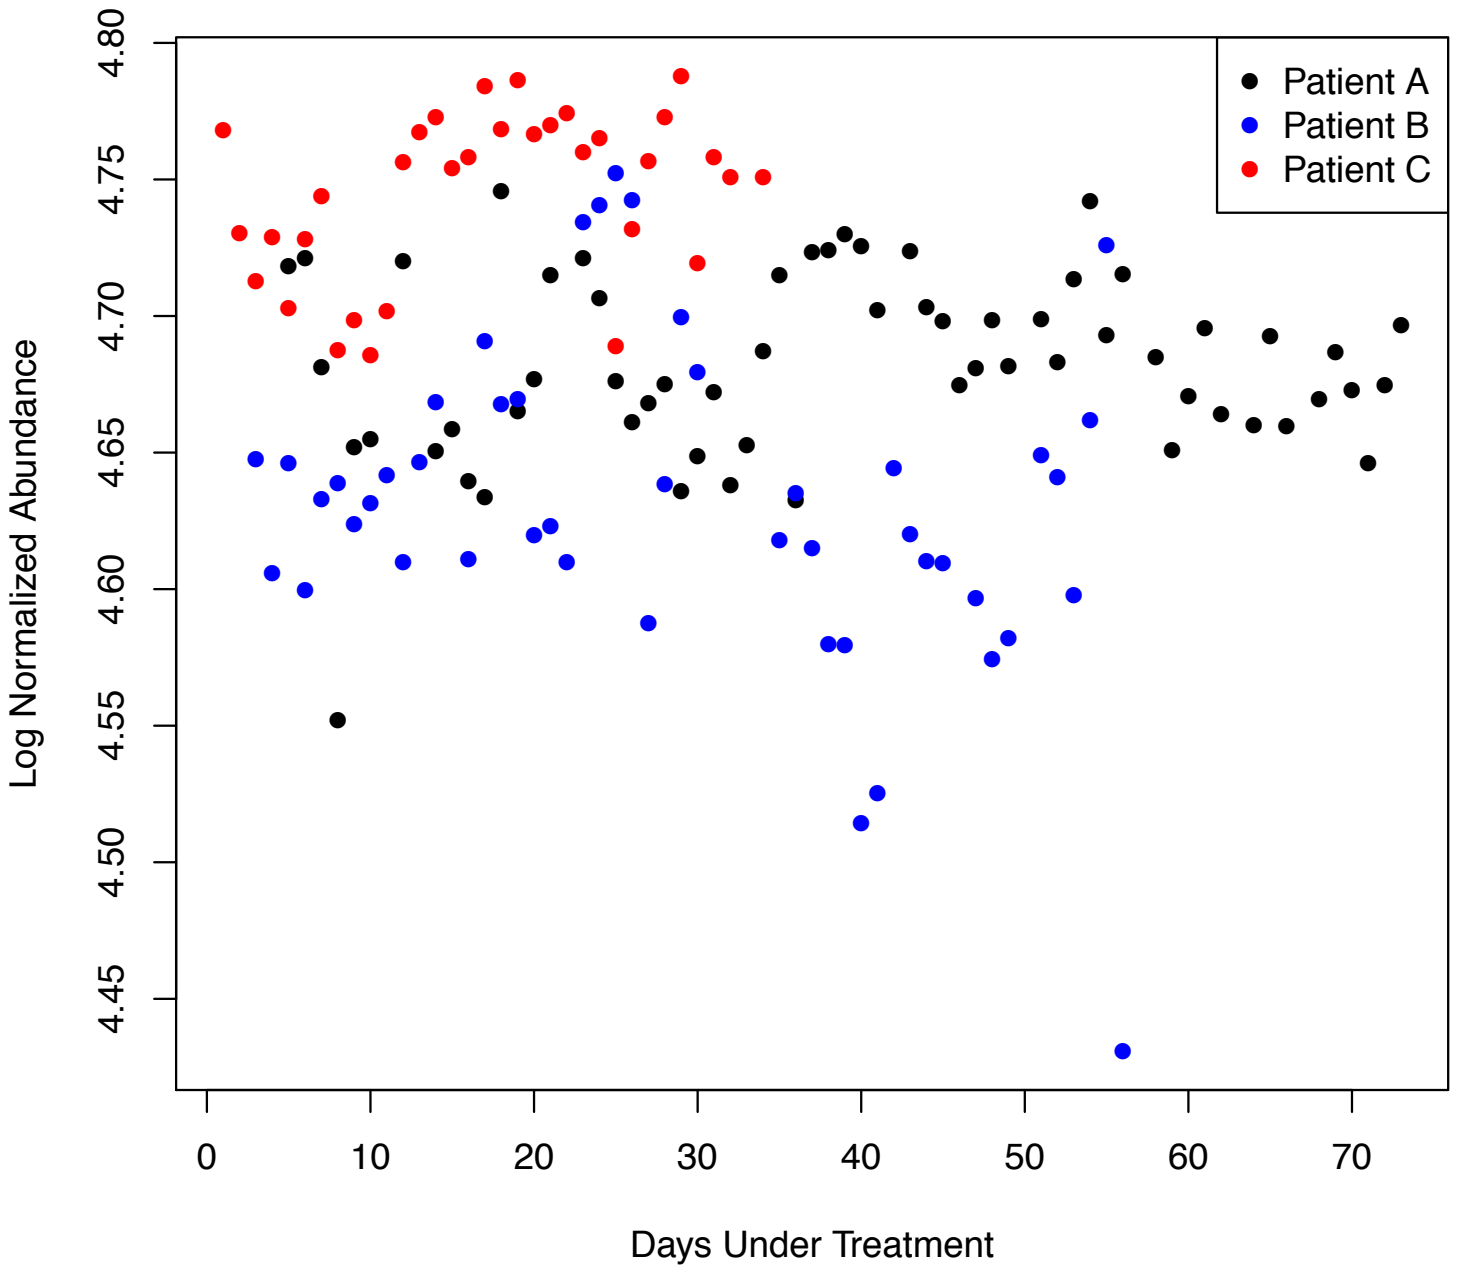

Supplement: NIHMS954230-supplement-Figure_S1_panel_A.pdf [file NIHMS954230-supplement-Figure_S1_panel_A.pdf]

# Bifidobacteriales

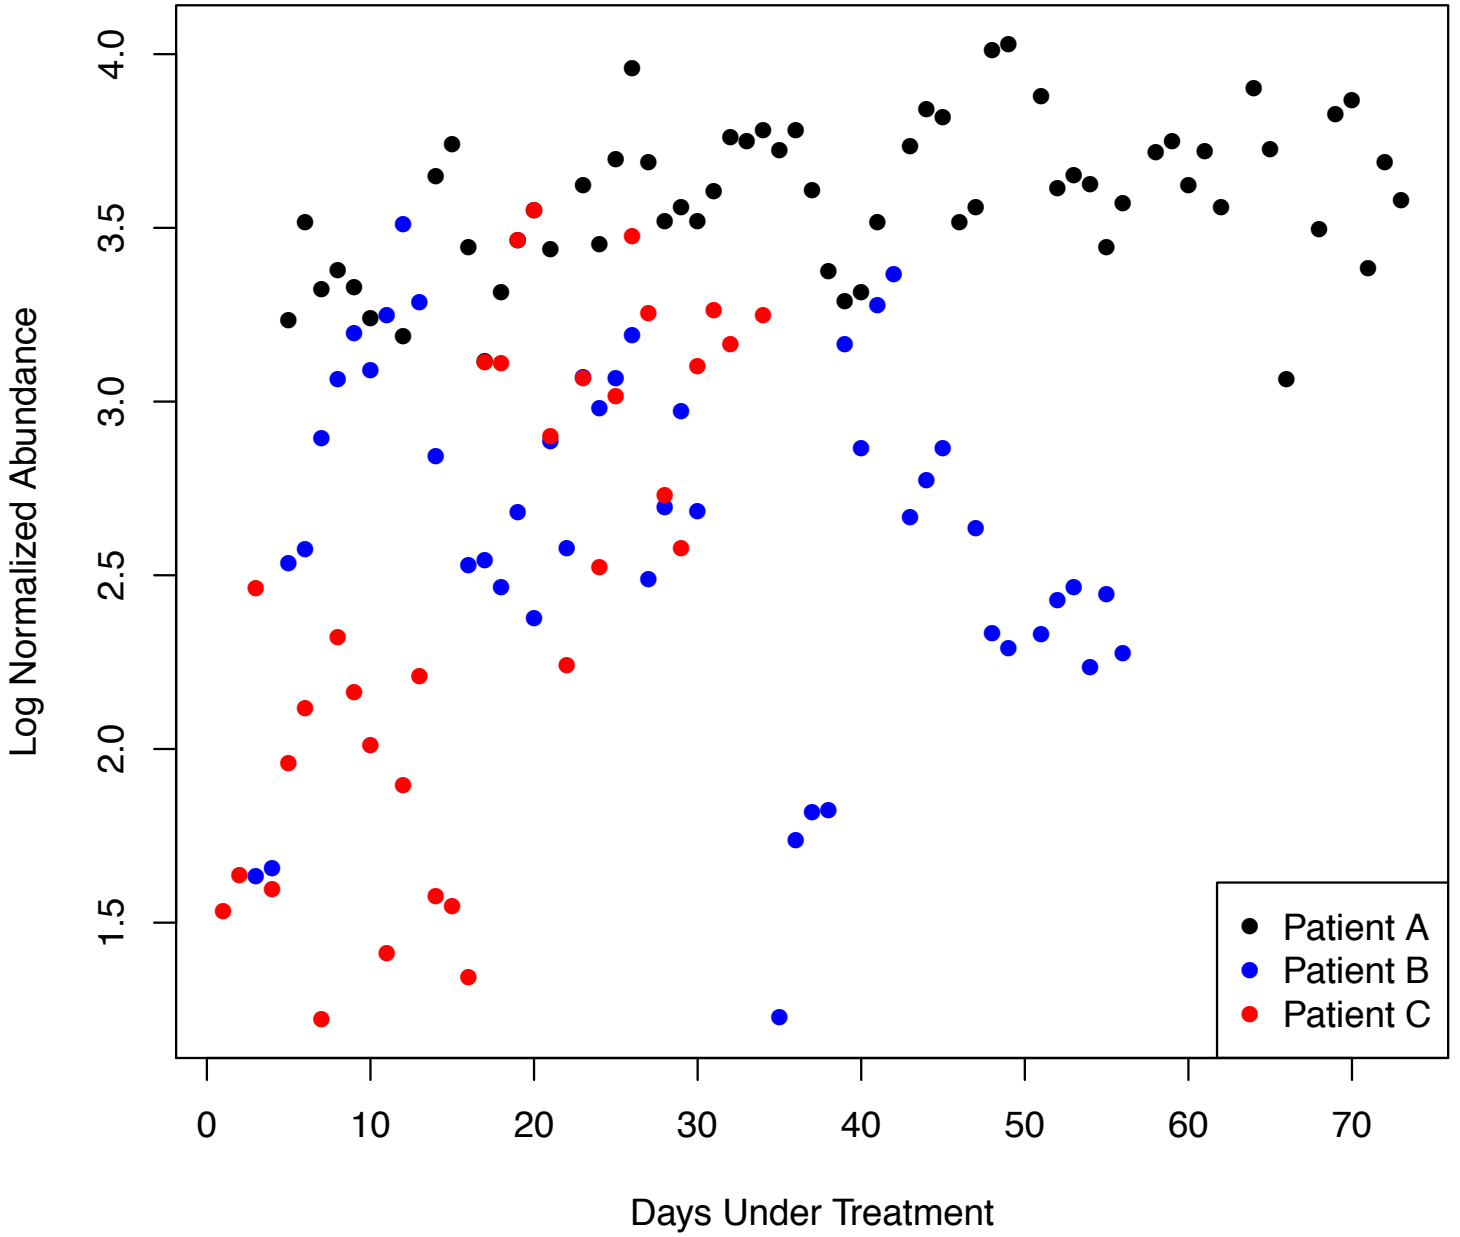

Supplement: NIHMS954230-supplement-Figure_S1_panel_B.pdf [file NIHMS954230-supplement-Figure_S1_panel_B.pdf]

# Clostridiaceae.1

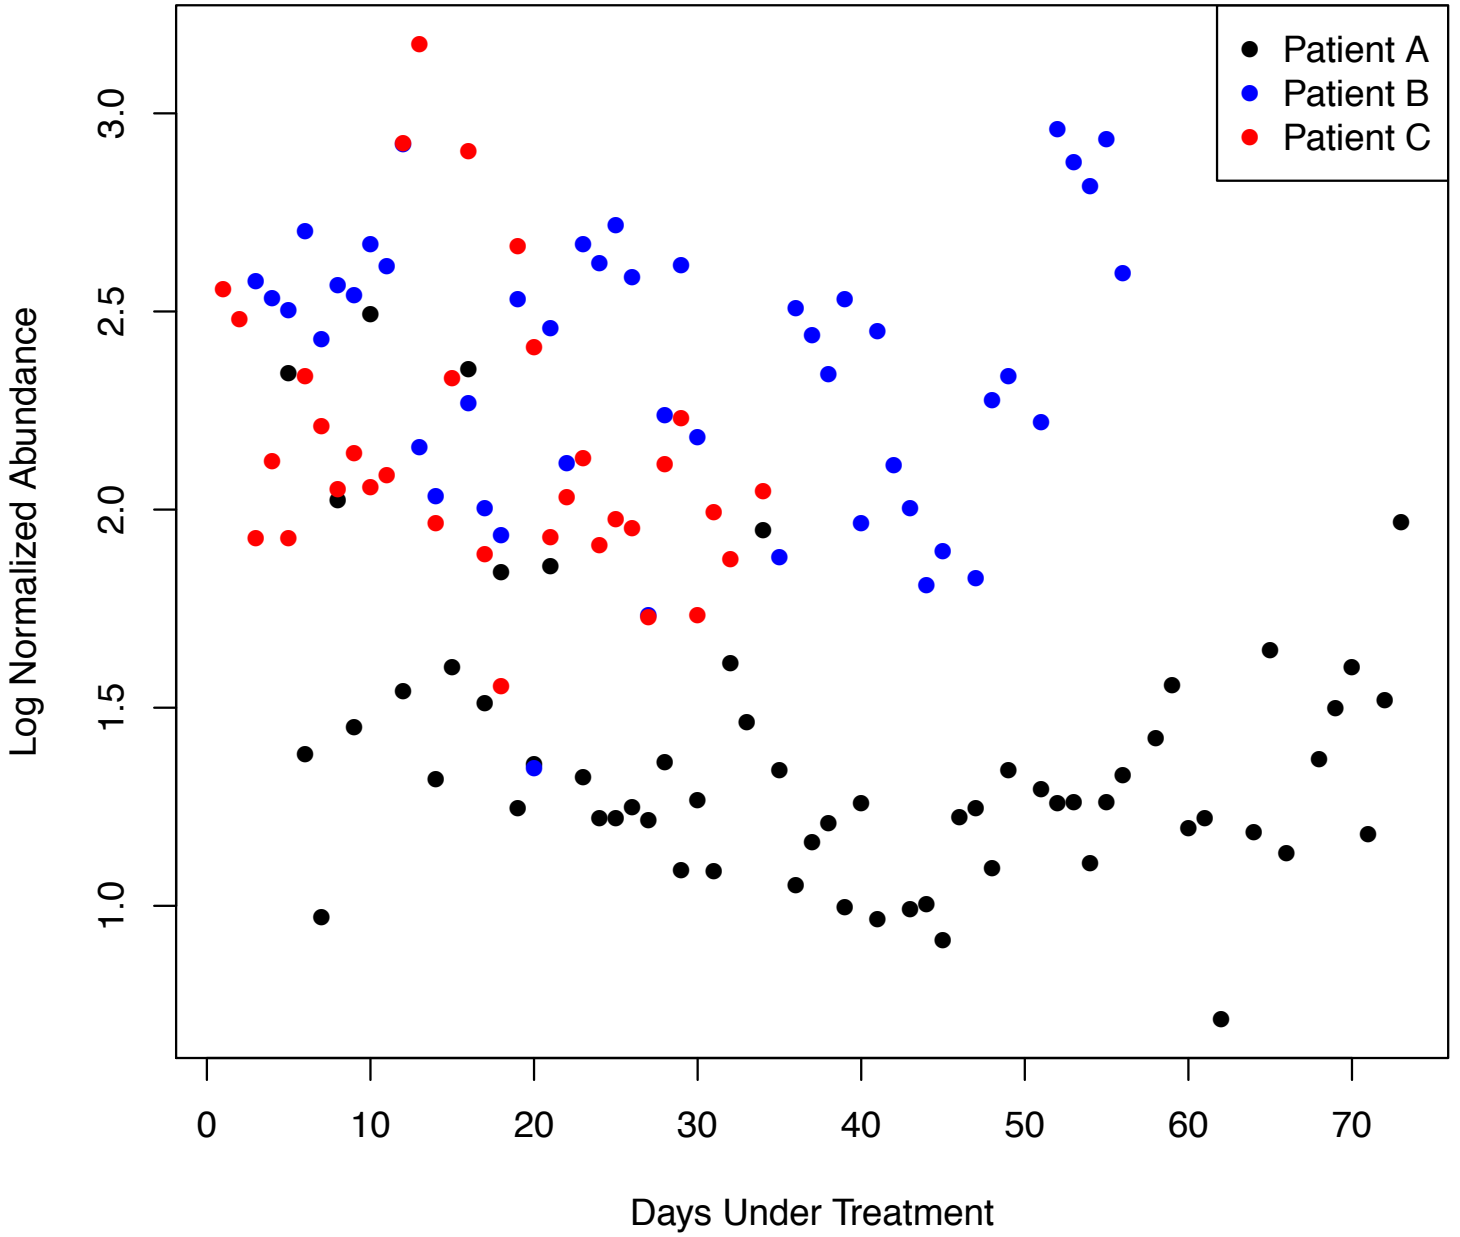

Supplement: NIHMS954230-supplement-Figure_S1_panel_C.pdf [file NIHMS954230-supplement-Figure_S1_panel_C.pdf]

# Lactonifactor

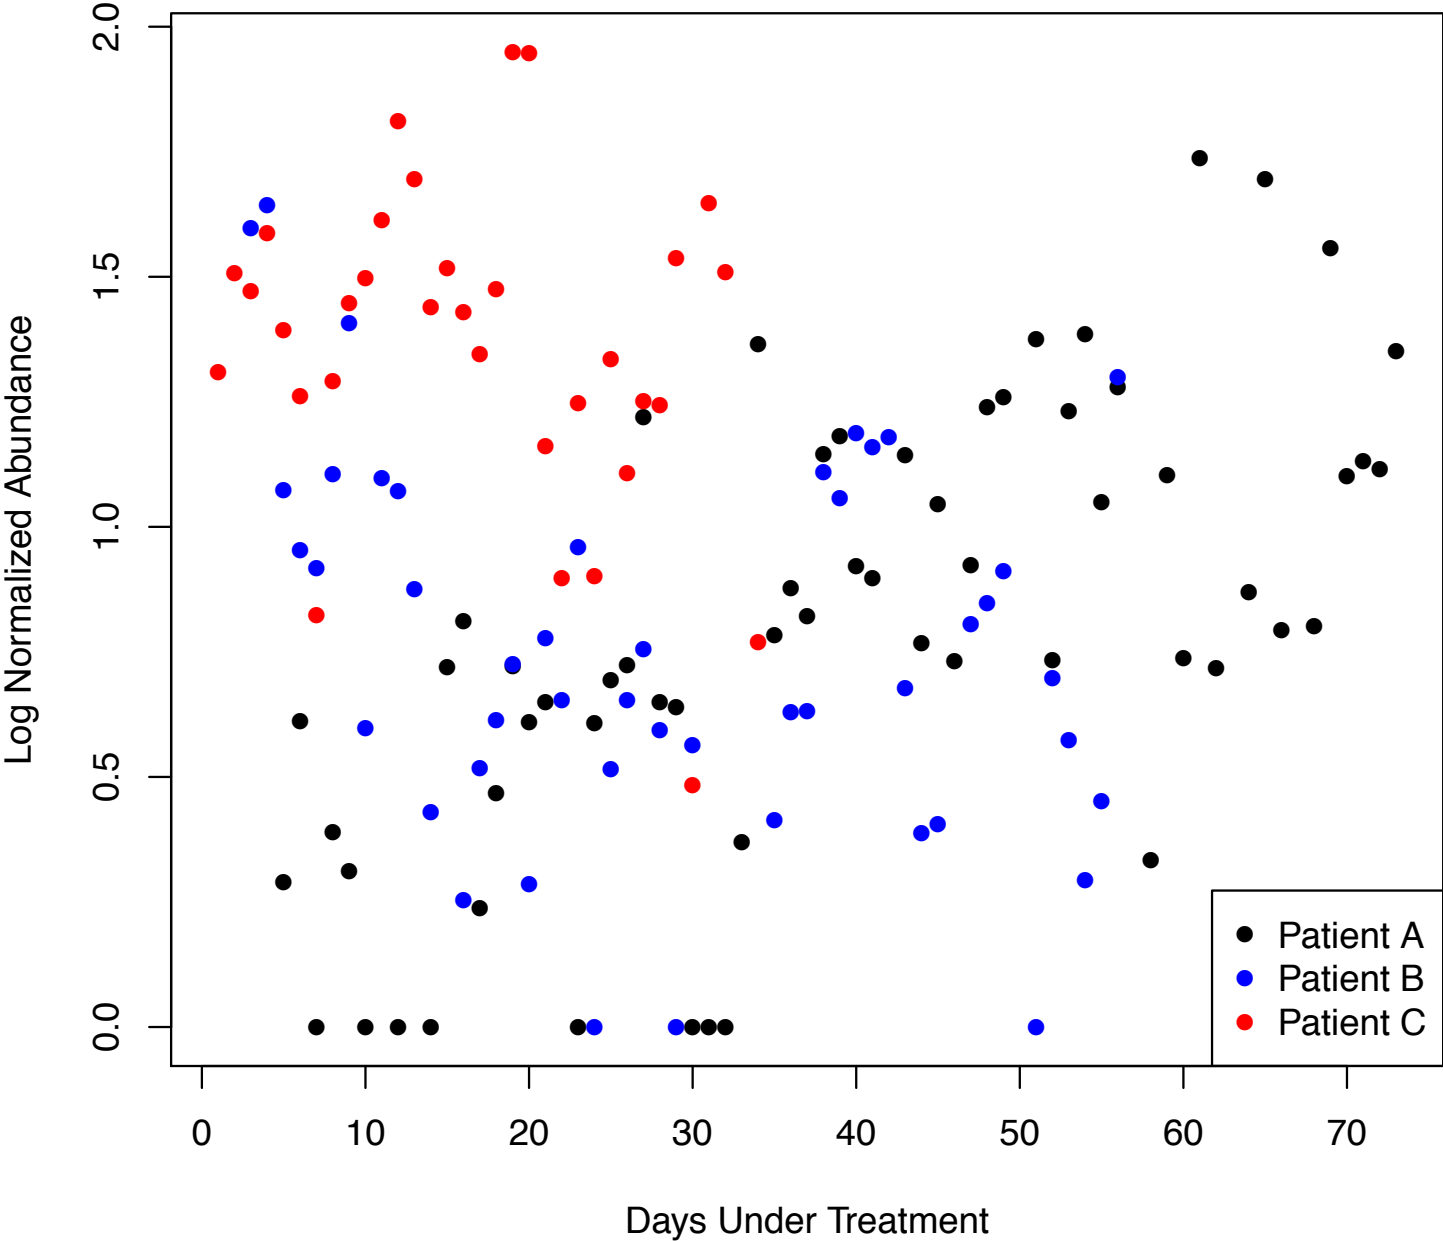

Supplement: NIHMS954230-supplement-Figure_S1_panel_D.pdf [file NIHMS954230-supplement-Figure_S1_panel_D.pdf]
